# Supplementary material for: Flat-Top Line-Shaped Beam Shaping and System Design
Source: MDPI journal article supplement (doi:10.3390/s22114199), 2022-05-31
Supplement: s1 [file s1]

The geometrical dimensions of aspherical cylindrical lens 1, aspherical cylindrical lens 2, cylindrical lens 3 and cylindrical lens 4 are shown in Figures S1–S4.

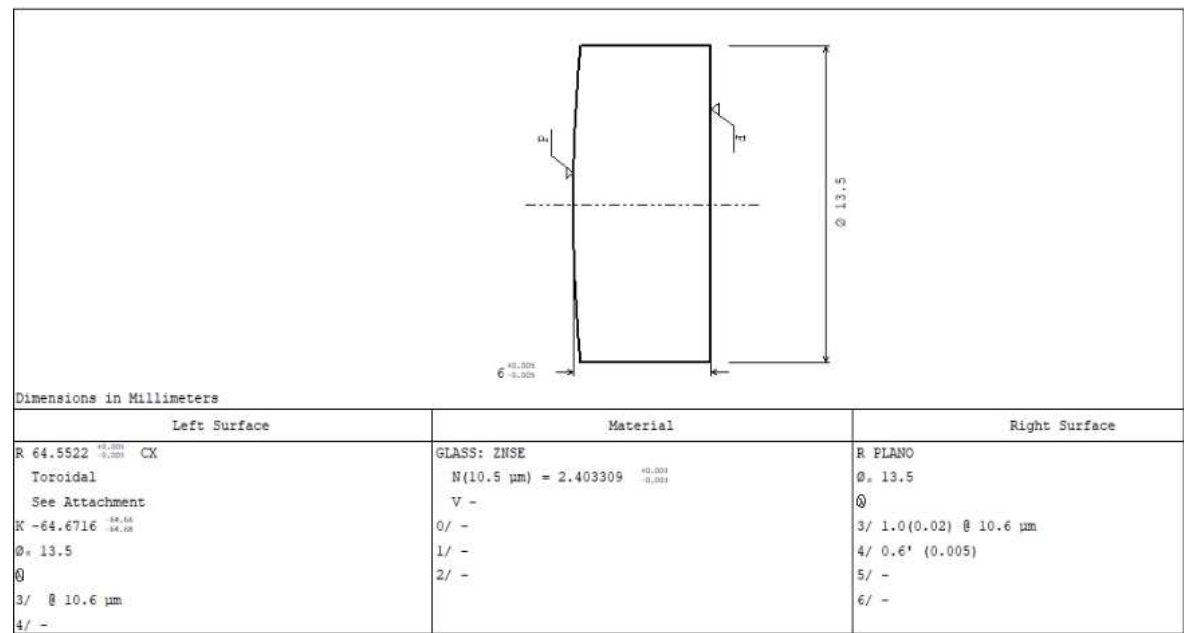

Figure S1. Geometrical dimensions of aspherical cylindrical lens 1

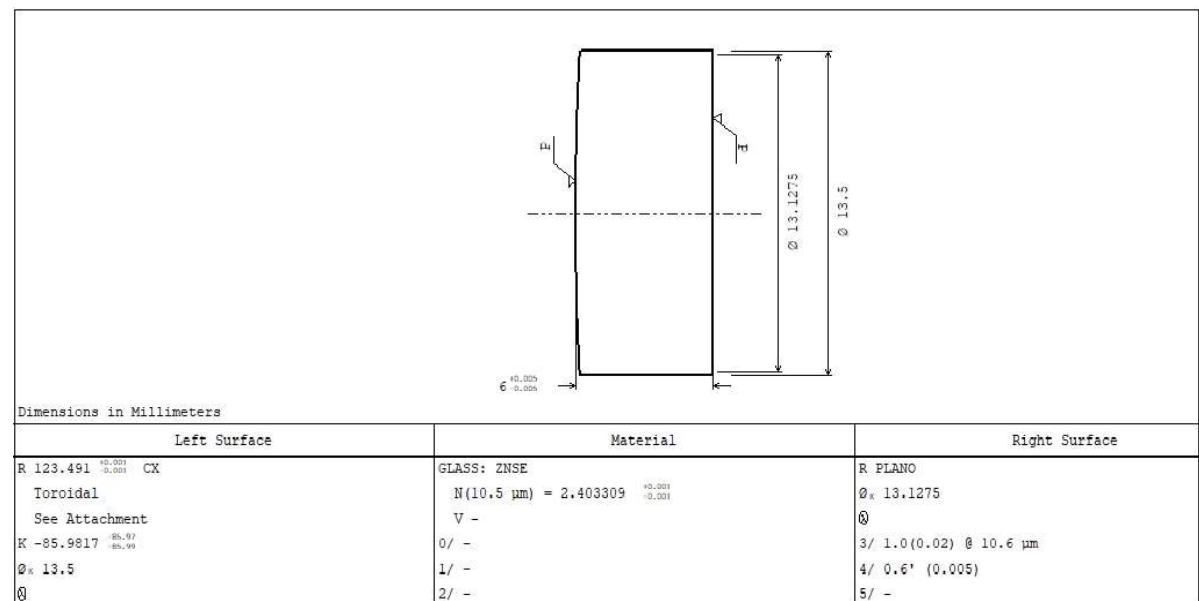

Figure S2. Geometrical dimensions of aspherical cylindrical lens 2

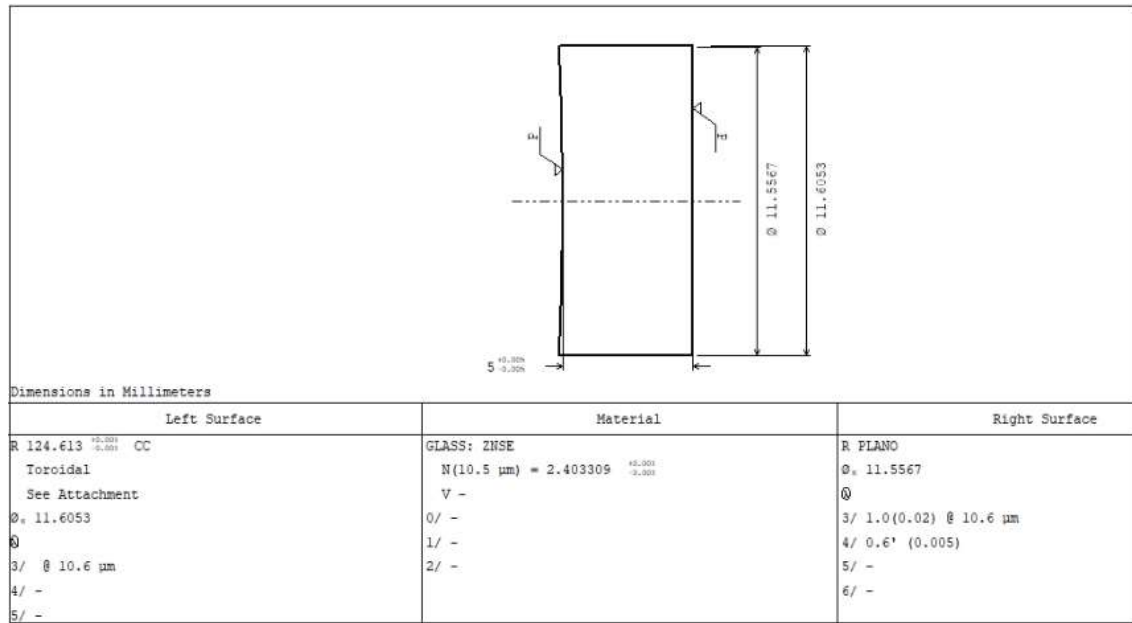

**Figure S3.** Geometrical dimensions of cylindrical lens 3

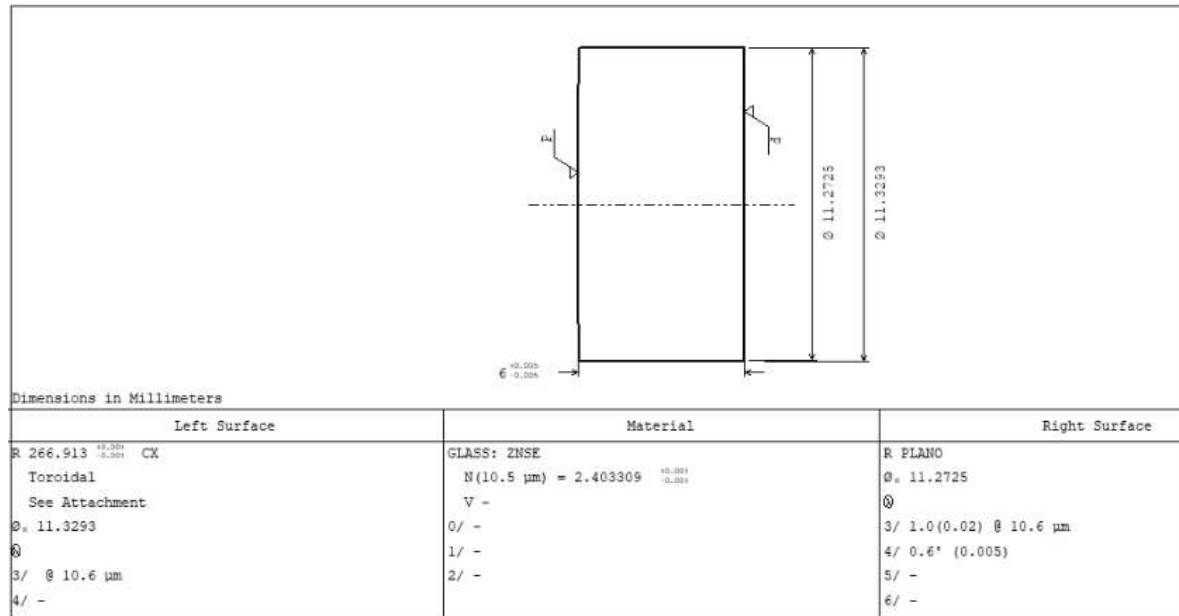

**Figure S4.** Geometrical dimensions of cylindrical lens 4
